# Supplementary material
Source: PubMed Central journal article supplement (PMC8741739)
Supplement: NIHMS1762541-supplement-2.pdf [file NIHMS1762541-supplement-2.pdf]

## SUPPLEMENT

### Figure S1 (related to Figure 1): Supporting cryo-EM data.

- A. Representative micrographs for APC $\Delta$ 7 apoenzyme (left) or holoenzyme (right).
- B. Representative 2D classes for APC $\Delta$ 7 apoenzyme (left) or holoenzyme (right).
- C. Comparison of select 2D classes for wild-type APC (left, unpublished data in-house), and APC $\Delta$ 7 apoenzyme (middle) or holoenzyme (right). The presence or absence of APC7 in this pose is indicated with a white arrow.
- D. Gold-standard Fourier Shell Correlation traces for APC $\Delta$ 7 apoenzyme (left) or holoenzyme (right). The 0.143 cutoff is indicated as a horizontal line, and values are available in Table S1.

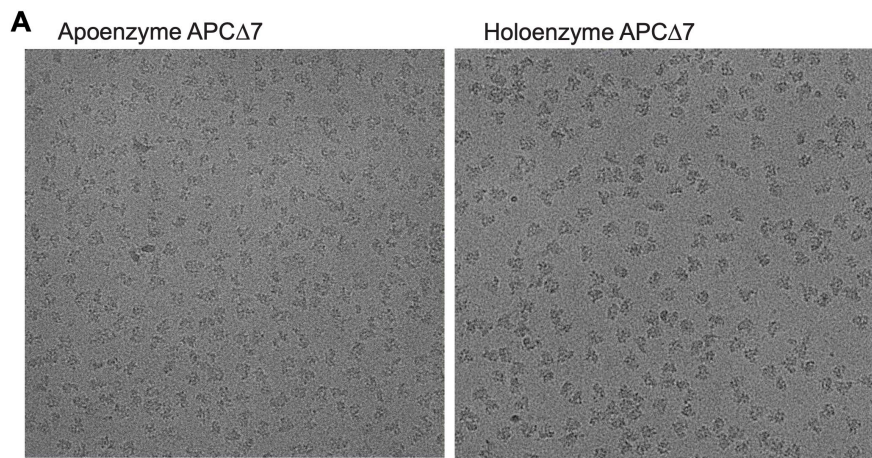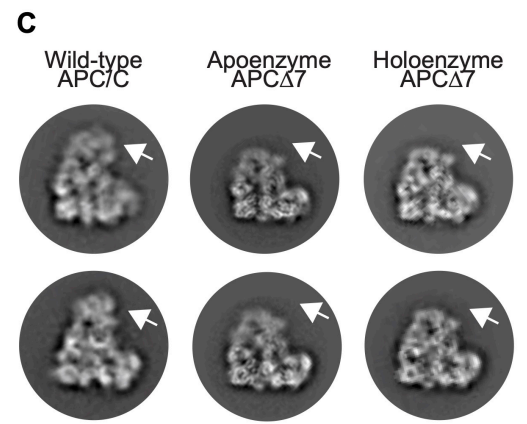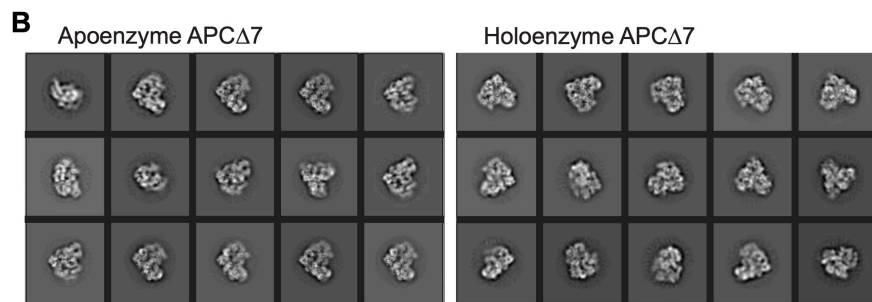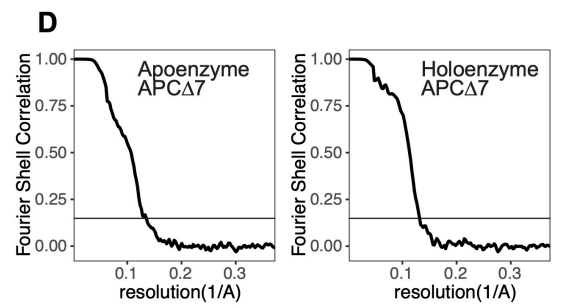

**Figure S2 (related to Figure 2): Loss of APC7 in the HAP1 cell line impairs substrate ubiquitination *in vitro*.**

- A. IP with anti-APC3 or isotype control antibody from HAP1 cell lysates followed by *in vitro* ubiquitination assays using the fluorescent substrates CycB-NTD and securin. Purified ubiquitin, Cdh1, E1 and E2 (Ube2C) were also included in the reaction.
- B. IP of APC3 from HAP1 cell lysates followed by *in vitro* assessment of substrate ubiquitination by the E2 enzyme Ube2C.
- C. IP of APC3 from HAP1 cell lysates followed by *in vitro* assessment of combined substrate ubiquitination (Ube2C) and ubiquitin chain elongation (Ube2S).
- D. IP of APC3 from HAP1 cell lysates followed by *in vitro* assessment ubiquitination in response to escalating Ube2C. The reaction was stopped after 45 min.
- E. IP of APC3 from HAP1 cell lysates followed by *in vitro* assessment of ubiquitination using escalating concentrations of the substrate-binding coactivator Cdh1. The reaction was stopped after 45 min.

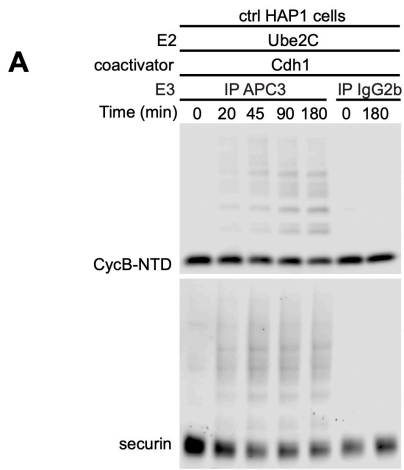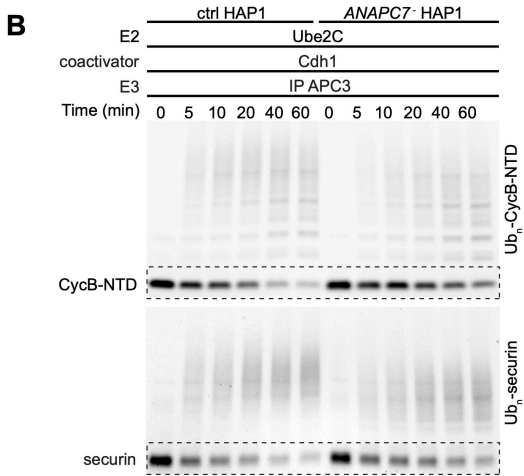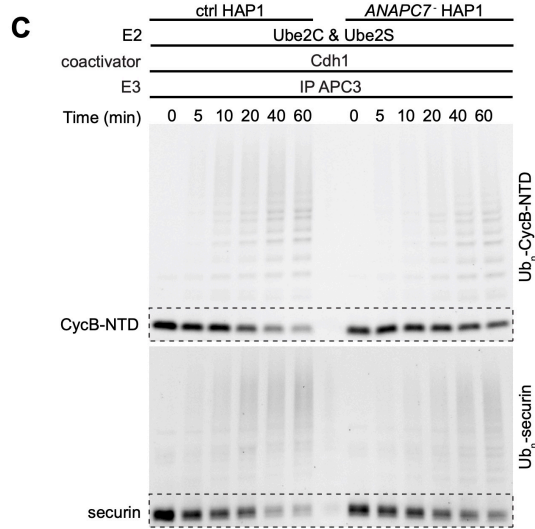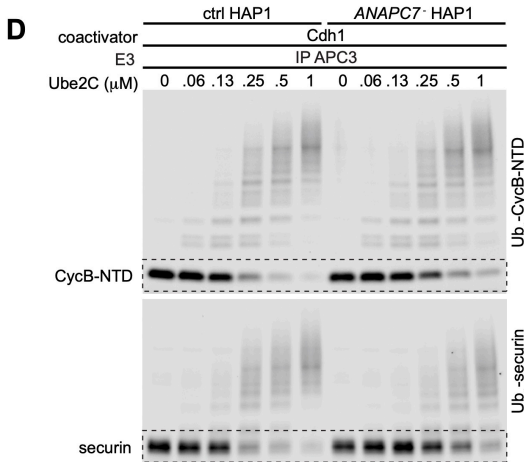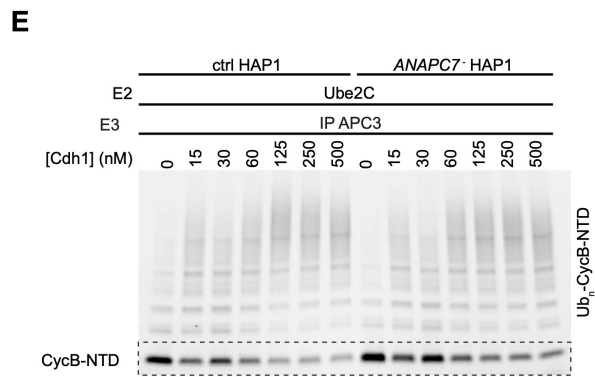

**Figure S3 (related to Figure 3): Genetic and clinical characterization of patients with the *ANAPC7* syndrome.**

- A. Array comparative genome hybridization (CGH) showing each patient's genotype at single nucleotide polymorphisms. Brown regions represent the maximum possible size for the deletion in *ANAPC7*.
- B. Sequencing chromatogram of DNA from lymphoblasts of patient 2227. The deletion begins in intron 3 and ends in intron 6 of *ANAPC7*.
- C. Pedigree connecting affected probands.
- D. Body weight, length and head circumference of affected patients. Data shown as age and sex adjusted Z scores, where  $Z = \frac{\text{patient value} - \text{reference mean}}{\text{one reference standard deviation}}$ .
- E. Cumulative distribution of patients' ability to sit and walk independently as compared to unaffected controls (p-value by chi-square test).

**A Patient ID:**

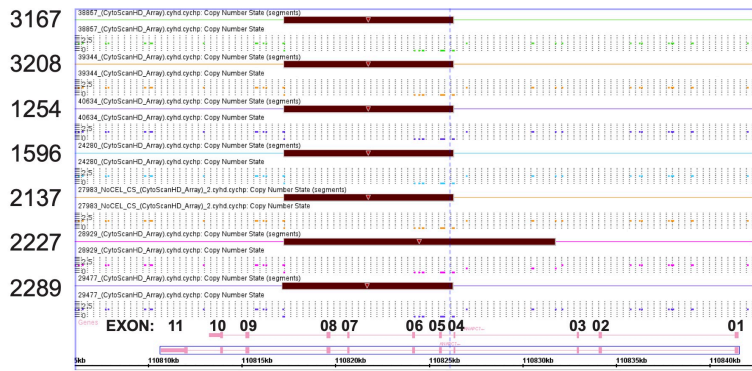

**B**

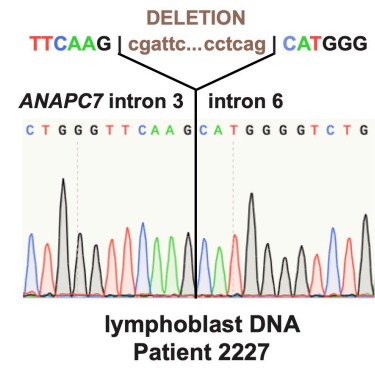

**C**

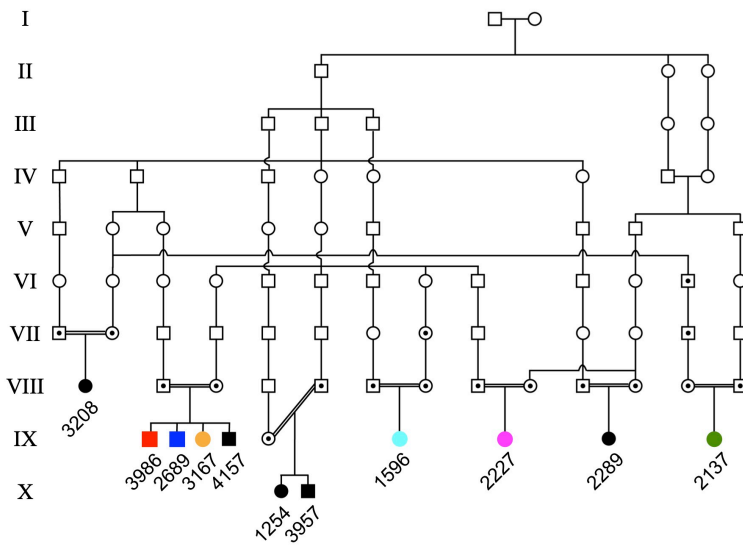

**D**

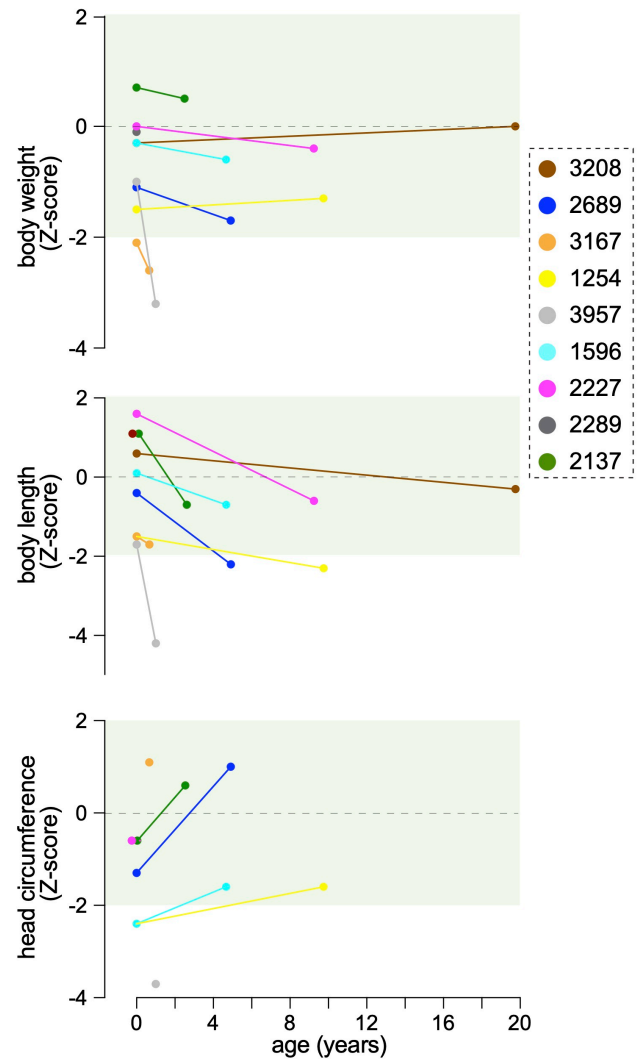

**E**

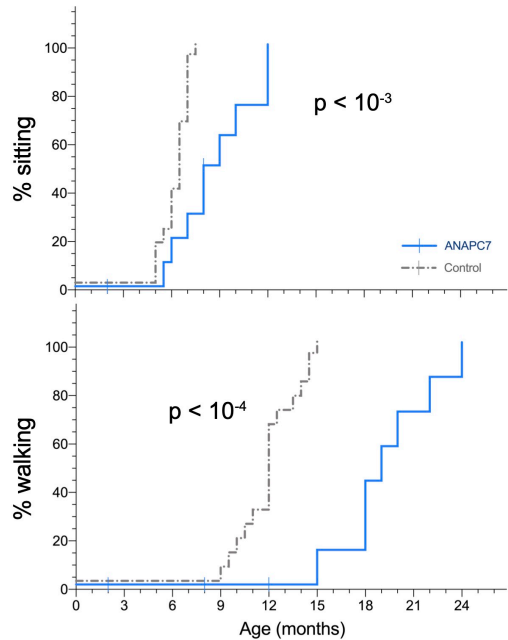

**Figure S4 (related to Figure 3): APC7 is enriched in nuclei and APC abundance and enzymatic activity decline during mouse brain development.**

- A. IB of APC subunits from the TPR (tetra-tricopeptide repeat) lobe and platform sub-complexes over developmental time. Mechanical dissociation was used to separate whole brain into nuclear and cytoplasmic fractions. Boxed regions highlight the cellular distribution of APC7 and APC3, which are distinct from other APC subunits.
- B. IB of APC subunits in the developing cerebral cortex in different cellular fractions.
- C. IB of APC subunits in the developing cerebellum in different cellular fractions.
- D. *In vitro* ubiquitination assay using immunoprecipitation of APC3 from whole brain as the source of E3 ubiquitin ligase. E1, Ube2C, Cdh1 and fluorescent cyclin B1-NTD (N-term domain) were included in the reaction.
- E. Densitometry-based quantitation of the abundance of the unmodified substrate over time. Band were normalized to the amount of substrate at time 0 for a given biological sample. P-values reflect differences between a time point on one curve and the same time point on the curve lying above or below. Error bars SEM (N = 4, \*\*p < 0.01, \*\*\*p < 0.001, \*\*\*\*p < 0.0001, by repeated measure ANOVA with Tukey test).

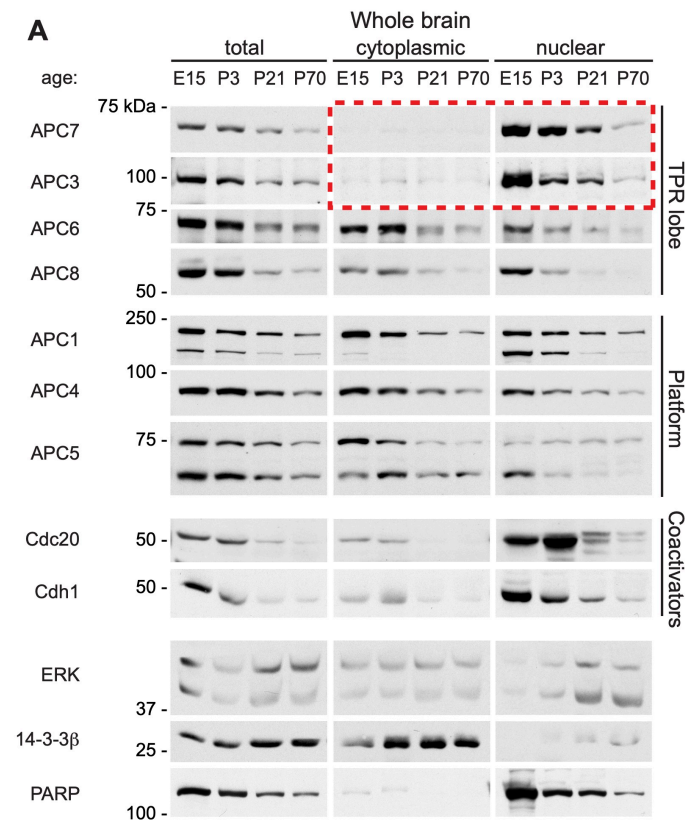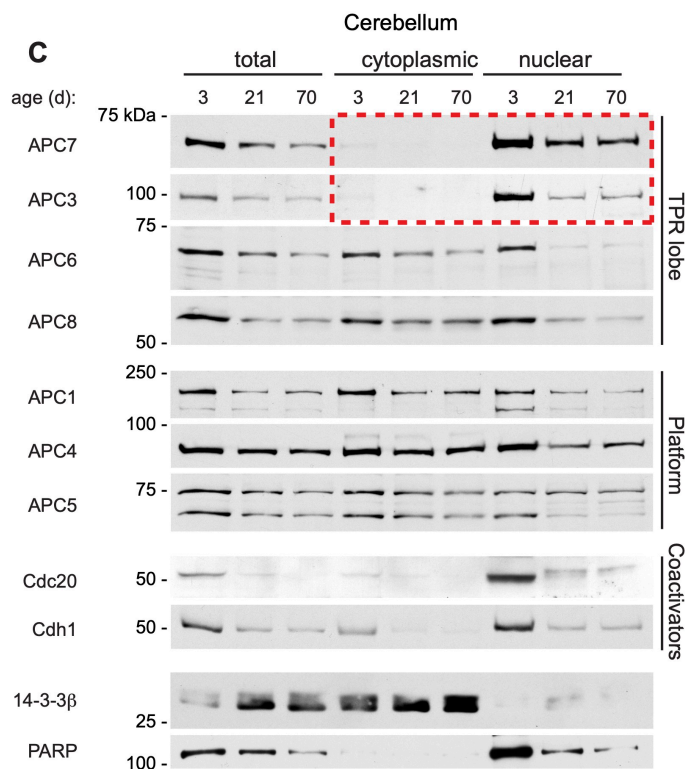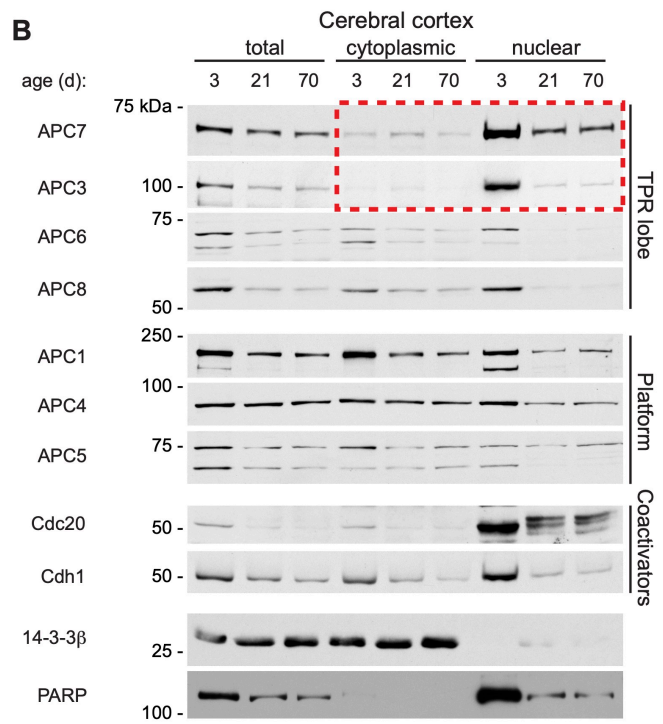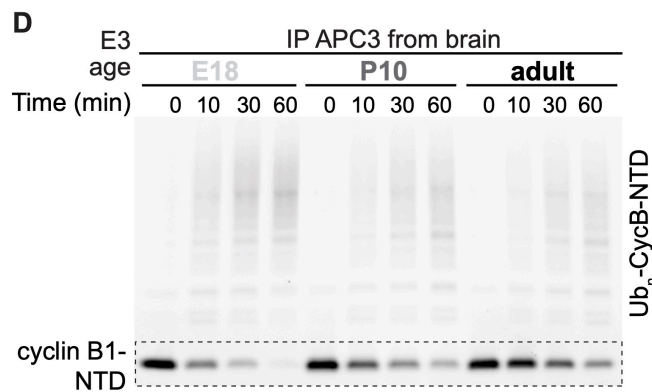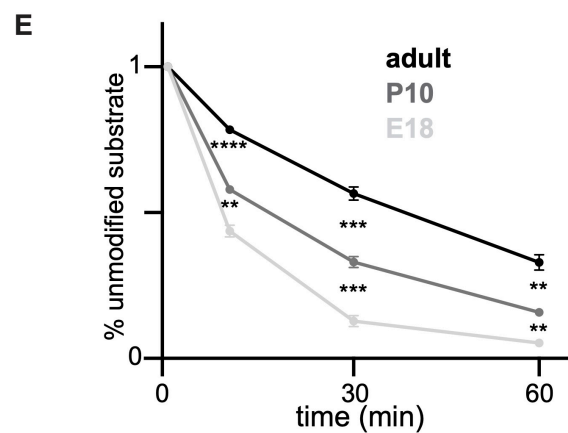



**Figure S5 (related to Figure 3): Development and characterization of a knock-in mouse mutant that recapitulates the *ANAPC7* syndrome patient mutation.**

- A. Strategy for targeting of *Anapc7* by homologous recombination in mouse embryonic stem cells. The 565 amino acid sequence of mouse APC7 is 98% identical to human APC7, however an alternative start codon in humans leads to the addition of 34 amino acids at the N-terminus of human APC7. In mice and humans the mutant allele induces a frameshift in exon 7. The G>A mutation in exon 7 was added to the targeting vector to prevent the generation of a longer mistranslated portion of exon 7 in the mouse due to differences in DNA sequence between mouse and human.
- B. Southern blot of the long arm of the targeting vector confirming successful recombination in clones 83, 32 and 42. Mice derived from blastocysts injected with clones 83 and 42 were selected for further study after establishing germline transmission in chimeric founders.
- C. APC7 expression by RT-qPCR in primary cerebellar granule neurons at the indicated day *in vitro*. Error bars SEM (N = 4).
- D. IP of endogenous APC1 and APC3 from mouse P5 whole brain followed by IB for components of the TPR lobe or the platform sub-complexes.
- E. Mutant mice at the indicated day of embryonic development.
- F. Growth of male and female mice through adulthood. Plots are staggered for display. Error bars SEM. No differences were observed at any age using repeated measures ANOVA and Tukey test.
- G. H&E stained sections of the telencephalon at age E14 (LV, lateral ventricle; LGE, lateral ganglionic eminence). Cerebral cortex and hippocampal formation at age P7 (DG, dentate gyrus; WM, white matter). Cerebellum at P12.
- H. Open field test. Error bars SEM (p-values by Kolmogorov-Smirnov test).

- I. Elevated plus maze. Error bars SEM. No significant genotype effects by Kolmogorov-Smirnov test.
- J. Sensorimotor battery of behavioral tests. Error bars SEM (p-values by Kolmogorov-Smirnov test).
- K. Morris water maze. Error bars SEM (\*p < 0.04 by repeated measure ANOVA with Bonferroni test).
- L. Cued fear conditioning. Error bars SEM. No significant genotype effect by repeated measure ANOVA.

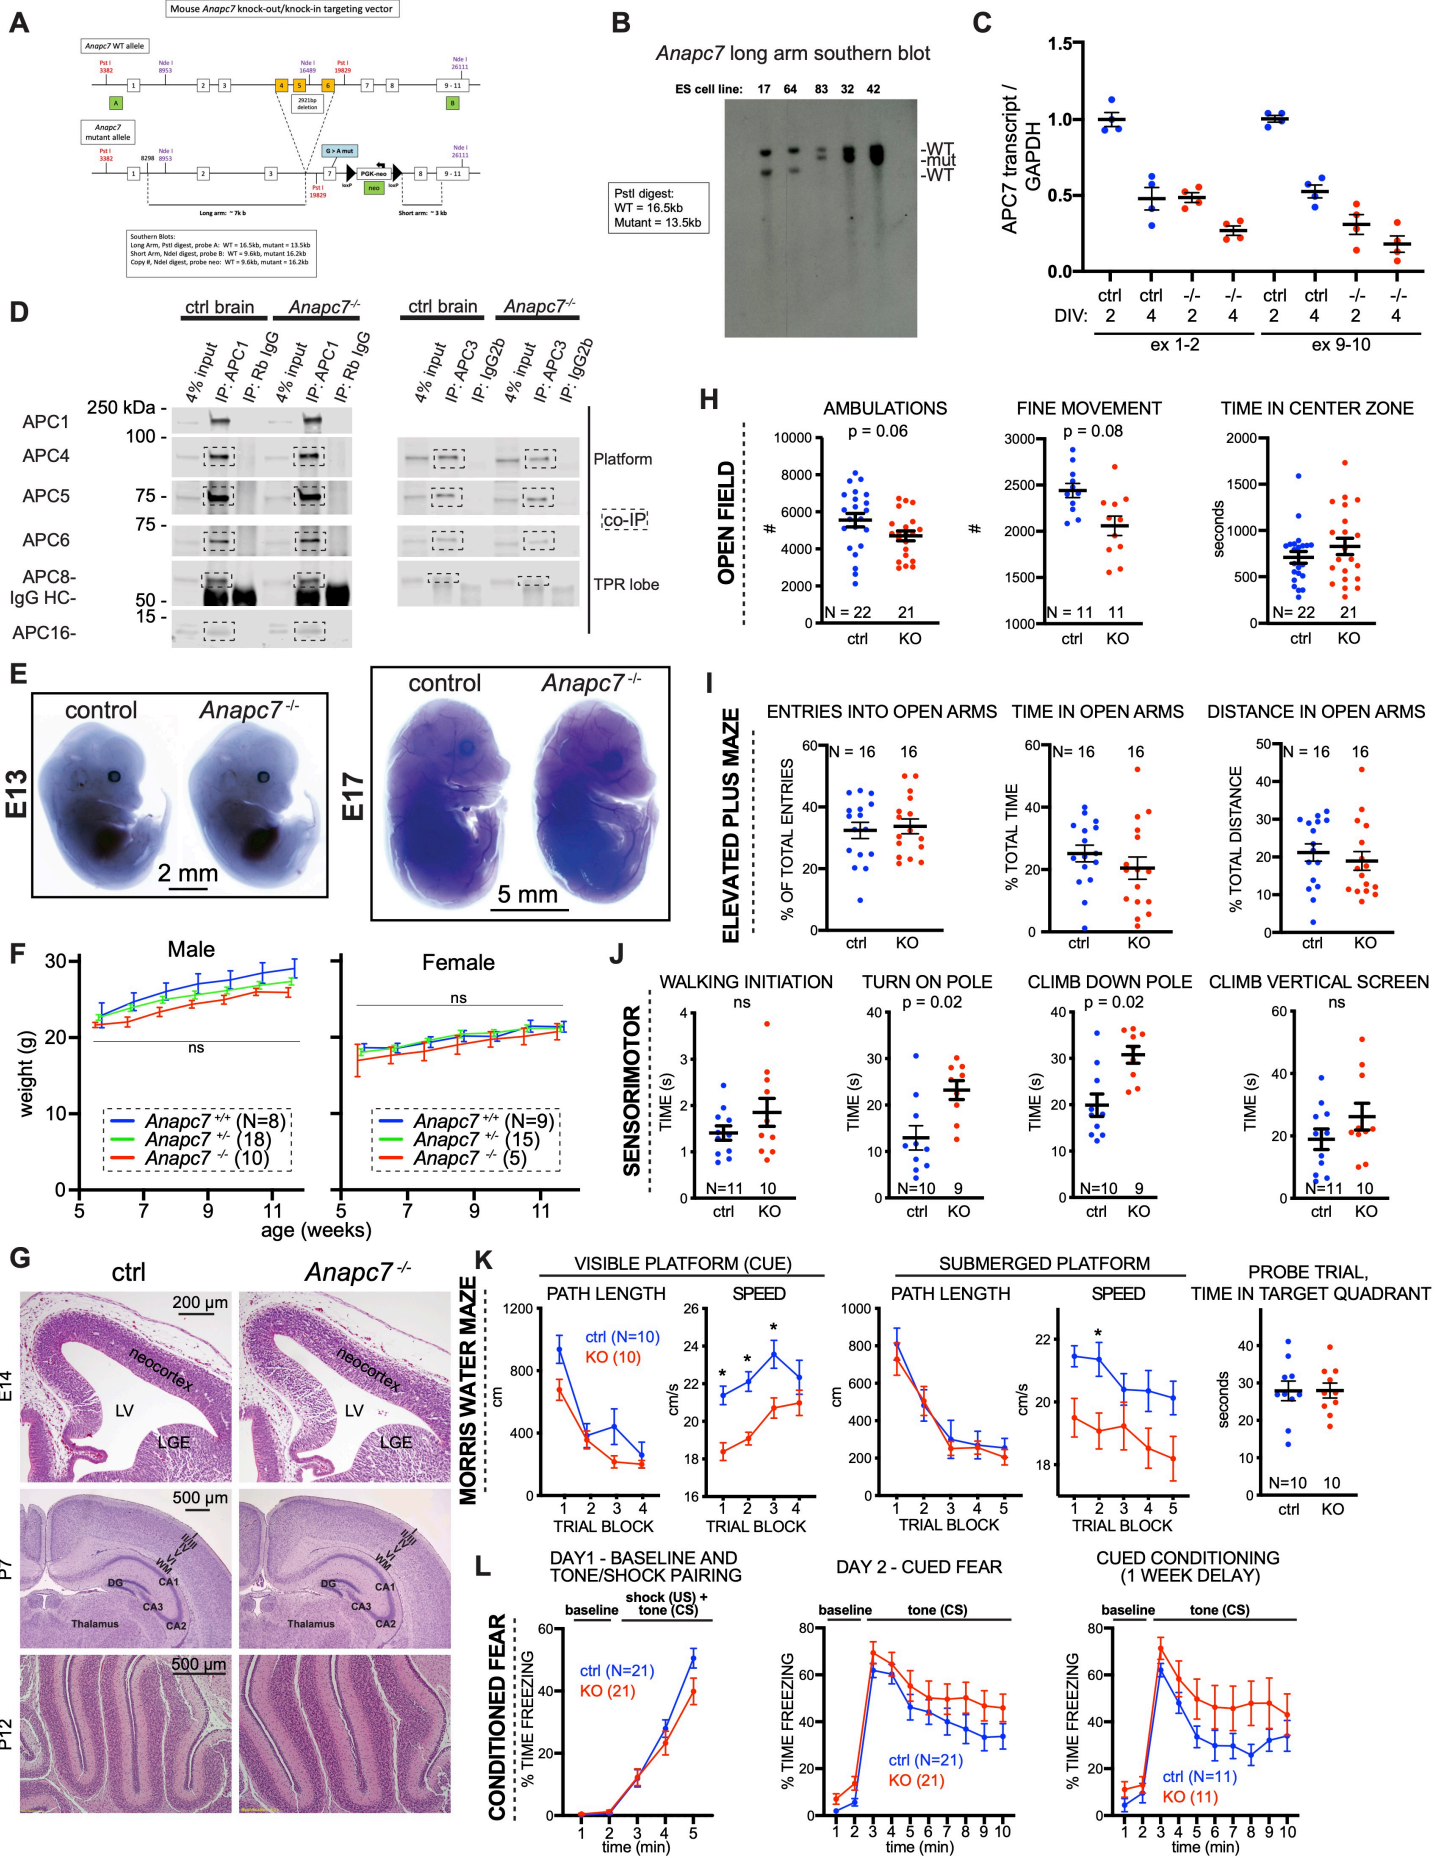

**Figure S6 (related to Figure 4): Loss of APC7 in the developing mouse brain does not perturb the cell cycle or neuronal migration.**

- A. Two-hour BrdU pulse at embryonic day 16 (E16) followed by IF detection of BrdU-positive cells in S phase. Positive cells in the developing isocortex were found in the ventricular zone (VZ) and sub-ventricular zone (SVZ) but not the cortical plate (CP).
- B. Two-hour BrdU pulse at E15 followed by IF detection of BrdU in the VZ and SVZ of the telencephalon.
- C. PCNA staining at E16 in the brainstem in the region of the 4th ventricle.
- D. H3S10ph IF in P11 cerebellum.
- E. Cyclin B1 IF in the region of the lateral ventricle at E16.
- F. BrdU injection at P7 followed by IF detection of BrdU-labeled cells at P9 to assess migration into the internal granule layer (IGL).
- G. BrdU injection at E17 followed by IF detection of BrdU-labeled cells at P7 to assess long-range migration into the superficial cortical layers.

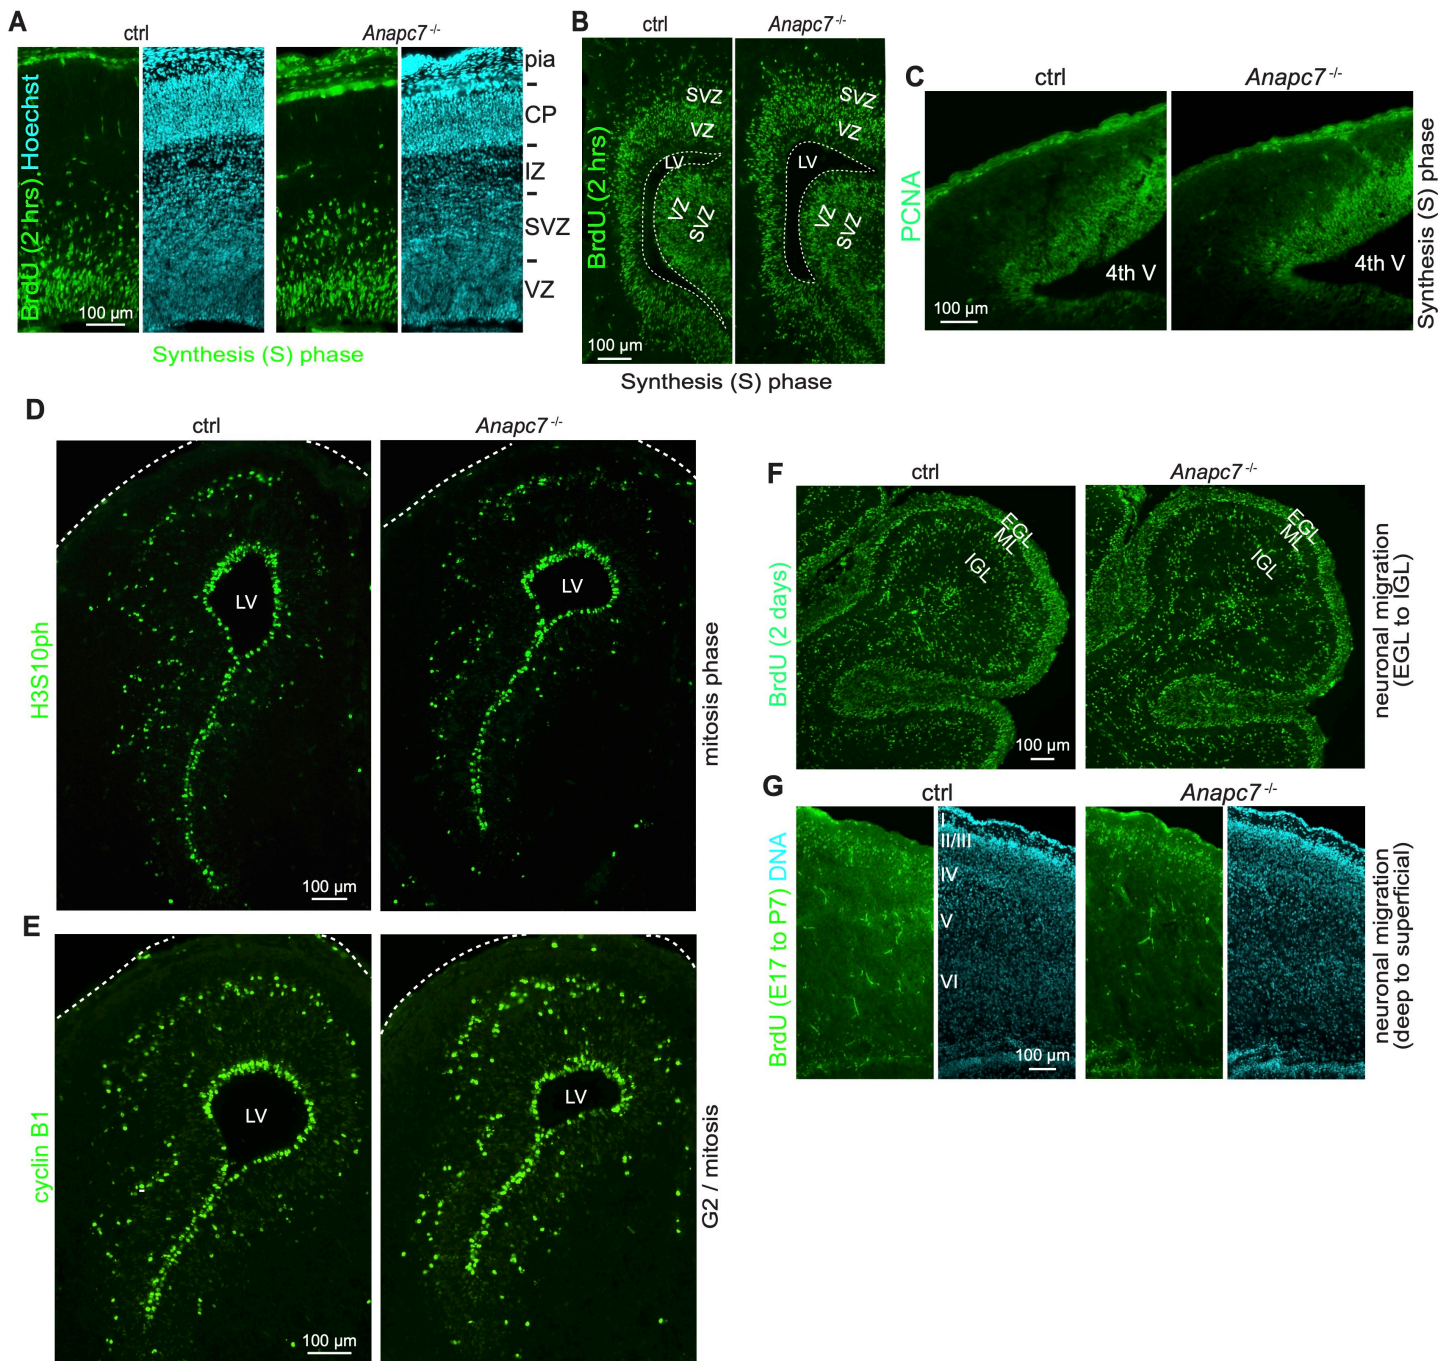

**Figure S7 (related to Figure 5): Ki-67 protein accumulates in post-mitotic neurons across the developing mutant brain.**

- A. Confocal IF of Ki-67 in the outer (o) and inner (i) external granule layer (EGL) of the cerebellum at P11.
- B. Ki-67 IF at E18 in coronal sections of developing isocortex.
- C. Ki-67 IF at E16 in coronal sections of the developing telencephalon (LGE, lateral ganglionic eminence; LV, lateral ventricle; ctx, cerebral cortex).
- D. Ki-67 IF at E16 in the developing diencephalon with magnified areas.
- E. Ki-67 IF at E16 in the developing brainstem with magnified areas.
- F. Ki-67 IF at E16 in the brainstem in the region of the 4th ventricle.
- G. Gating strategy for diploid nuclei labeled with anti-Ki-67 and Hoechst. Boxes represent gated regions depicted in the histogram in Figure 5I.
- H. Ki-67 IB in primary granule neurons at the indicated day *in vitro*.
- I. Densitometry-based quantitation of Ki-67 IB in primary granule neurons cultures at the indicated day *in vitro*. Error bars SEM (N = 3, p-values by two-way ANOVA and Bonferroni test).
- J. Ki-67 RT-qPCR normalized to GAPDH in cultured primary granule neurons at the indicated DIV (N = 4).
- K. Validation of a mouse line with RFP knocked in at the C-terminus of the endogenous *MKi67* locus (Ki-67-RFP). Anti-RFP resin was used to IP Ki67-RFP from benzonase-digested lysates of P7 cerebellum of the indicated genotypes. Anti-RFP IP pulled down Ki-67, which was detected by IB, only when the transgene was present.
- L. Anti-RFP IP from benzonase-digested P8 cerebellar lysates from experimental *Anapc7<sup>-/-</sup>*, Ki-67-RFP and control *Anapc7<sup>+/+</sup>*, Ki-67-RFP mice.
- M. Detection of Ki-67-RFP by confocal microscopy in DIV2 primary granule neurons from mice of the indicated genotypes.

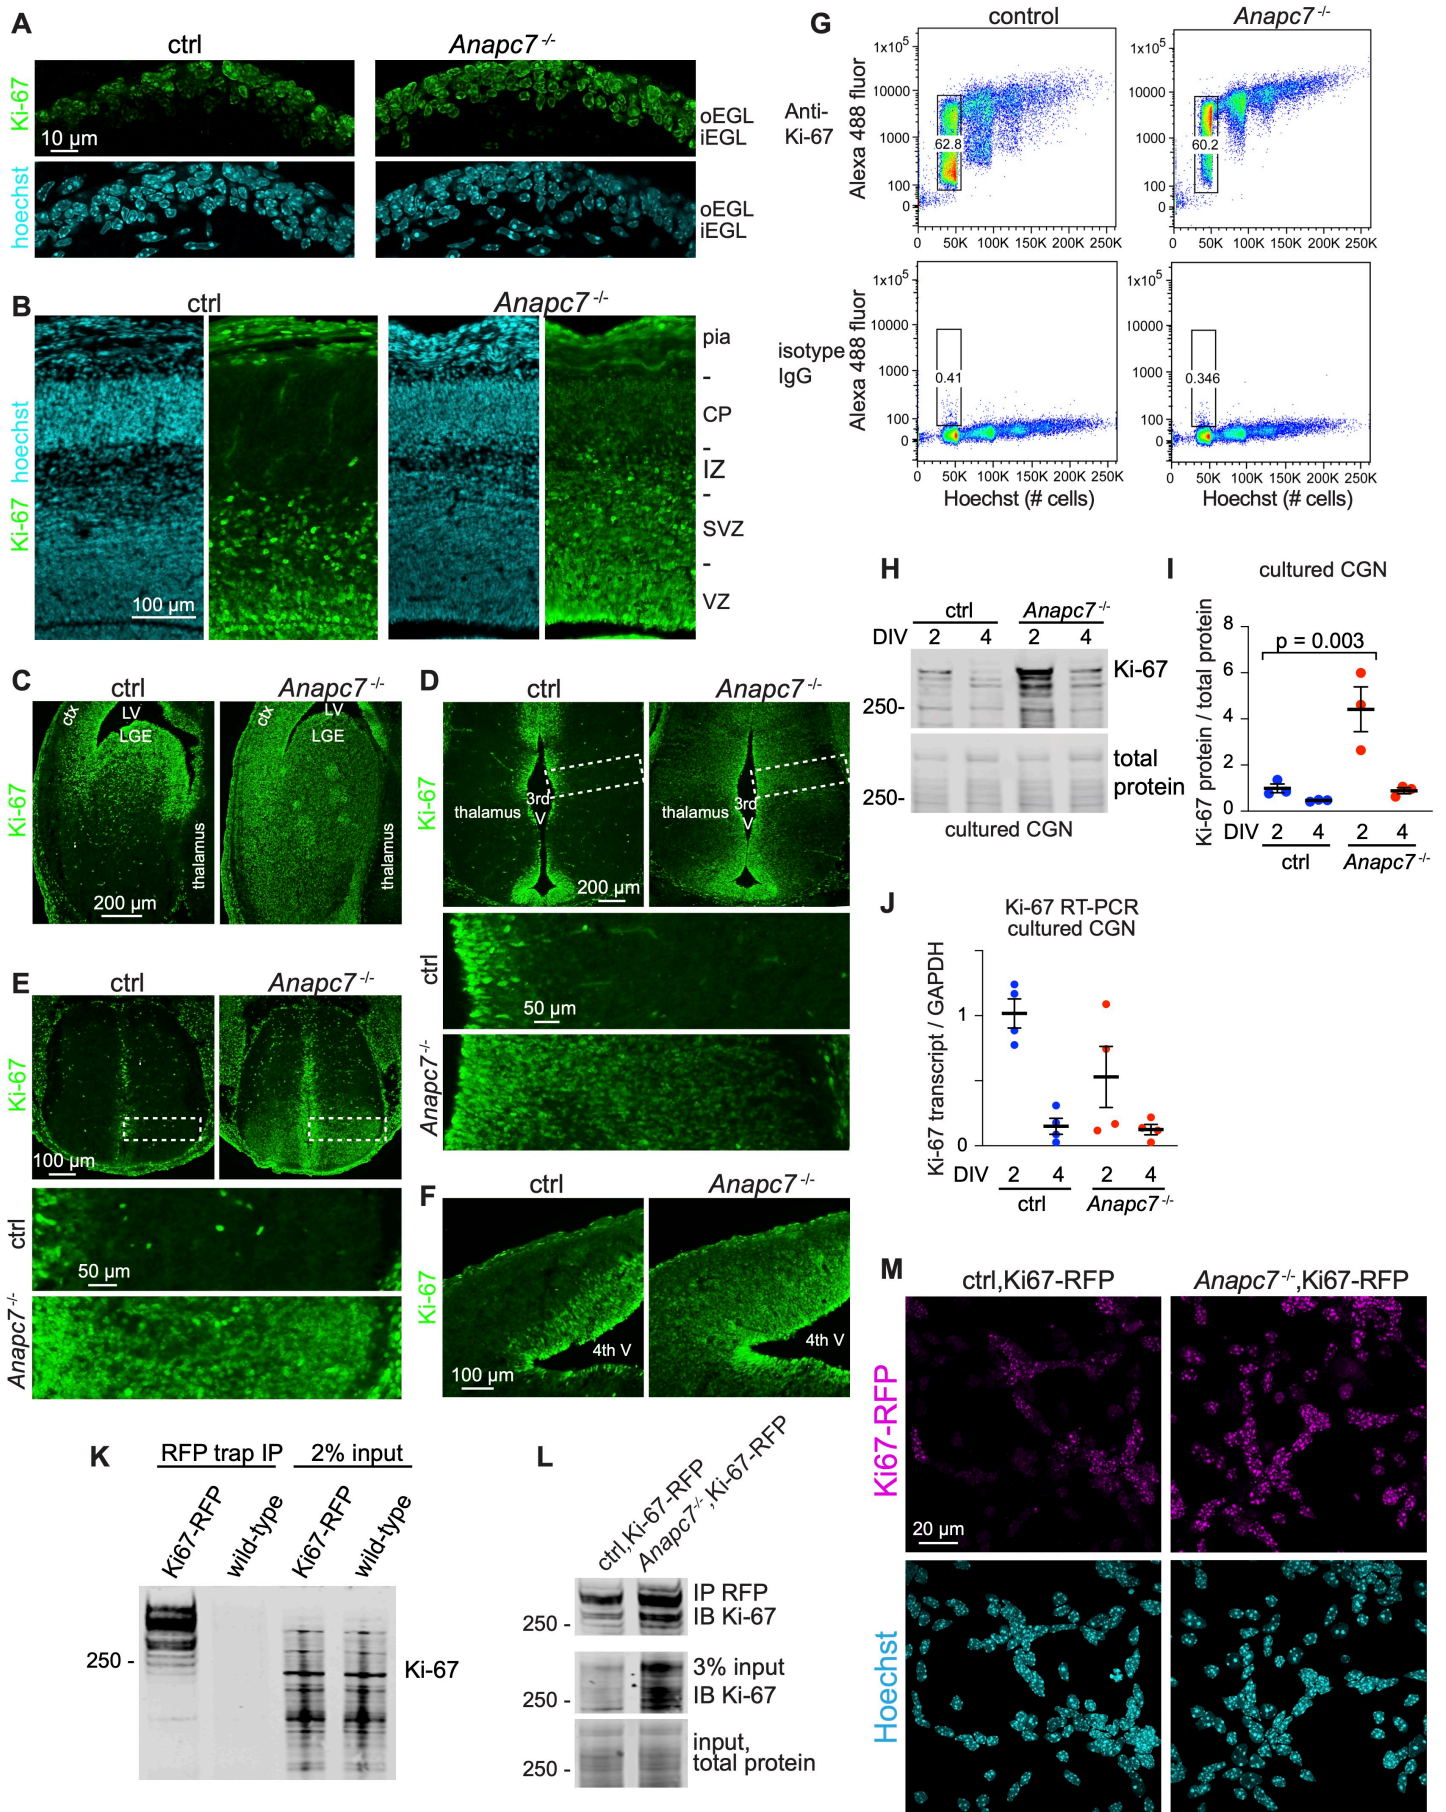

## **SUPPLEMENTAL TABLES**

Table S1 (related to Figure 1): Cryo-EM imaging and data processing statistics

Table S2 (related to Figure 3): Clinical characteristics of patients with the *ANAPC7* syndrome

Table S4 (related to STAR Methods): Oligonucleotides used in this study



**Table S1 (Related to Figure 1): Cryo-EM imaging and data processing statistics**

|                                                  | APC $\Delta$ 7 | APC $\Delta$ 7-Cdh1-Ube2c-UbV |
|--------------------------------------------------|----------------|-------------------------------|
| Microscope                                       | Titan Krios    | Titan Krios                   |
| Magnification                                    | 105,000        | 105,000                       |
| Voltage                                          | 300            | 300                           |
| Electron exposure e <sup>-</sup> /A <sup>2</sup> | 60             | 57                            |
| Defocus range ( $\mu$ m)                         | -1.2 ~ -3.6    | -0.7 ~ 3.4                    |
| Pixel Size (A <sup>o</sup> )                     | 1.34           | 1.34                          |
| Symmetry Imposed                                 | C1             | C1                            |
| Initial particle Images (nos)                    | 1,736,614      | 305,406                       |
| Final particle images (nos)                      | 113,895        | 54,172                        |
| Map Resolution (A <sup>o</sup> )                 | 7.4            | 7.6                           |
| FSC threshold                                    | 0.143          | 0.143                         |
| Alignment Accuracy                               |                |                               |
| Rotation ( $^{\circ}$ )                          | 2.1            | 2.5                           |
| Translation (pixels)                             | 1.2            | 1.6                           |

**Table S2 (Related to Figure 3): Clinical characteristics of patients with the ANAPC7 syndrome**

|                         | Family 1           | Family 2                       |                  |                     |                                   | Family 3                          |                      | Family 4            | Family 5            | Family 6                | Family 7            |
|-------------------------|--------------------|--------------------------------|------------------|---------------------|-----------------------------------|-----------------------------------|----------------------|---------------------|---------------------|-------------------------|---------------------|
| Patient ID              | 3208               | 3986                           | 2689             | 3167                | 4157                              | 1254                              | 3957                 | 1596                | 2227                | 2289                    | 2137                |
| Sex                     | F                  | M                              | M                | F                   | M                                 | F                                 | M                    | F                   | F                   | F                       | F                   |
| Indication for Referral | Primary Amenorrhea | Incidentally seen with sibling | Poor weight gain | Developmental delay | Family history of ANAPC7 deletion | Cleft palate, Developmental delay | Diaphragmatic hernia | Developmental delay | Developmental Delay | Intellectual Disability | Developmental delay |
| Age at last evaluation  | 19y 9m             | 3y 5m                          | 4y 11m           | 8m                  | 2m                                | 9y 9m                             | 12 m                 | 4y 8m               | 9y 3m               | 18y 10m                 | 2y 6m               |
| Craniofacial            |                    |                                | m                |                     |                                   |                                   |                      |                     |                     |                         |                     |
| Micrognathia            | -                  | -                              | +                | -                   | +                                 | +                                 | +                    | +                   | -                   | -                       | +                   |
| High-arched palate      | -                  | -                              | +                | +                   |                                   |                                   |                      |                     | -                   |                         | +                   |
| Cleft palate            | -                  | -                              | -                | -                   | -                                 | +                                 | +                    | -                   | -                   | -                       | -                   |
| Strabismus              | +                  | +                              | -                | -                   |                                   | +                                 | +                    | -                   | +                   | -                       | -                   |
| Hearing loss            | -                  | +                              | +                | +                   |                                   | +                                 |                      | -                   | -                   | -                       | +                   |
| Hyper telorism          | -                  | +                              | +                | +                   |                                   | +                                 | +                    | +                   | -                   | -                       | -                   |

|                                                  |                                                                                                         |   |                                                                                |   |  |                                 |                                                                                                 |   |   |   |   |
|--------------------------------------------------|---------------------------------------------------------------------------------------------------------|---|--------------------------------------------------------------------------------|---|--|---------------------------------|-------------------------------------------------------------------------------------------------|---|---|---|---|
| Neuro logic                                      |                                                                                                         |   |                                                                                |   |  |                                 |                                                                                                 |   |   |   |   |
| Devel opme ntal delay/ Intelle ctual disabil ity | +                                                                                                       | + | +                                                                              | + |  | +                               | +                                                                                               | + | + | + | + |
| Hypot onia                                       | -                                                                                                       | + | +                                                                              | + |  | -                               | +                                                                                               | + | + | + | + |
| Skelet al                                        |                                                                                                         |   |                                                                                |   |  |                                 |                                                                                                 |   |   |   |   |
| Pectu s Excav atum                               | -                                                                                                       | + | +                                                                              | + |  | +                               | -                                                                                               | - | + | + | + |
| Other                                            | unilat eral Cong enital hype rtrop hy of the retin al pigm ent epith elium , prim ary ovar ian failur e |   | unilat eral coro nal sutu re ridg e, coro nary to pul mon ary arte ry fistu la |   |  | bilater al stenot ic ear canals | Cong enital diaphr agmat ic hernia , unilat eral ptosis , micro cepha ly, patent foram en ovale |   |   |   |   |

**Table S3 (Related to Figure 5): Tandem-mass tag (TMT) proteomics in control and *Anapc7<sup>-/-</sup>* cerebellum at P8. Data available in the attached excel spreadsheet.**

**Table S4 (Related to STAR methods): Oligonucleotides used in this study**

|                                                                                         |                               |     |
|-----------------------------------------------------------------------------------------|-------------------------------|-----|
| APC7 ex 1-2 RT-PCR – F primer<br>GTGATAGACCACGTGCGG                                     | This paper                    | N/A |
| APC7 ex 1-2 RT-PCR – R primer<br>TTCTGCGACGGGGAAAACAG                                   | This paper                    | N/A |
| APC7 ex 3-5 RT-PCR – F primer<br>TGCTGTACTIONGATGGGATCC                                 | This paper                    | N/A |
| APC7 ex 3-5 RT-PCR – R primer<br>CGTCATTGATGCCACCTCTG                                   | This paper                    | N/A |
| APC7 ex 9-10 RT-PCR – F primer<br>TTGTGCTTGGACTGTTACG                                   | This paper                    | N/A |
| APC7 ex 9-10 RT-PCR – R primer<br>TCCTGGGTCACCTGGATCTTC                                 | This paper                    | N/A |
| Ki-67 RT-PCR - F primer<br>AATCCAACCTCAAGTAAACGGGG                                      | (Sobecki et al., 2016)        | N/A |
| Ki-67 RT-PCR - R primer<br>TTGGCTTGCTTCCATCCTCA                                         | (Sobecki et al., 2016)        | N/A |
| GAPDH RT-PCR - F primer<br>GTTGTCTCCTGCGACTTCA                                          | This paper                    | N/A |
| GAPDH RT-PCR - R primer<br>GGTGGTCCAGGGTTTCTT                                           | This paper                    | N/A |
| <i>Anapc7</i> genotype - F primer<br>AGAATAGTAGTCGGGCATCAAATGAGCGCG                     | This paper                    | N/A |
| <i>Anapc7</i> genotype - R1 primer<br>TGGTGAAGAGCACTTGCTGGTCTTGCAGAG                    | This paper                    | N/A |
| <i>Anapc7</i> genotype - R2 primer<br>CTCTGACTTCCAAGAGCACCTGTCCTCACC                    | This paper                    | N/A |
| ANAPC7 CRISPR guide RNA #1<br>GCTGGCAAACCTGTACAAGA                                      | This paper                    | N/A |
| ANAPC7 gRNA #1 – F primer<br>AATGTACAGGCAAGATTGAGAAC                                    | This paper                    | N/A |
| ANAPC7 gRNA #1 – R primer<br>TTGCACAGGGTTGTGGGTAG                                       | This paper                    | N/A |
| ANAPC7 CRISPR guide RNA #2<br>TCAGCATGCAGAACCGTGGG                                      | This paper                    | N/A |
| ANAPC7 gRNA #2 – F primer<br>GGTTCAAGCAATCCACCTGT                                       | This paper                    | N/A |
| ANAPC7 gRNA #2 – R primer<br>GAGCCTGTGATGGTGGAAG                                        | This paper                    | N/A |
| ANAPC7 CRISPR guide RNA #3<br>TGAATGTGATAGACCACGTG                                      | This paper                    | N/A |
| ANAPC7 gRNA #3 – F primer<br>GGATTCAGCCTAGCGATGTG                                       | This paper                    | N/A |
| ANAPC7 gRNA #3 – R primer<br>AAAGGCCGTTAGGTCTGTCC                                       | This paper                    | N/A |
| ANAPC7 CRISPR guide RNA #4<br>TGCTGTGAGTAAGTATACCA                                      | This paper                    | N/A |
| ANAPC7 gRNA #4 – F primer<br>TGTGCAGCCTGGTTCCTAAC                                       | This paper                    | N/A |
| ANAPC7 gRNA #4 – R primer<br>GGGAGCTTGGATTGAAAGG                                        | This paper                    | N/A |
| <i>Fzr1</i> , <i>Cdh1</i> floxed allele genotyping – F primer<br>GCTGGGGGACTTCTCATTTTCC | (García-Higuera et al., 2008) | N/A |

|                                                                                       |                               |     |
|---------------------------------------------------------------------------------------|-------------------------------|-----|
| <i>Fzr1</i> , <i>Cdh1</i> floxed allele genotyping – R primer<br>AGCATCGTGACCGCTTCACC | (García-Higuera et al., 2008) | N/A |
| <i>Cdc20</i> floxed allele genotyping – F primer<br>GATTTGCACTCACTGCTTCAACTGG         | (Manchado et al., 2010)       | N/A |
| <i>Cdc20</i> floxed allele genotyping – R primer<br>CTTTCTGATGCTCCTGAAATACACG         | (Manchado et al., 2010)       | N/A |
| Math1/ <i>Atoh1</i> cre genotyping – F primer<br>CATTTAACACCGTCGTCACC                 | This paper                    | N/A |
| Math1/ <i>Atoh1</i> cre genotyping – R primer<br>GCAAACGGACAGAAGCATTT                 | This paper                    | N/A |
| Major satellite – F primer<br>GGCGAGAAAACCTGAAAATCACG                                 | (Ebert et al., 2013)          | N/A |
| Major satellite – R primer<br>AGGTCCTTCAGTGTGCATTTTC                                  | (Ebert et al., 2013)          | N/A |
| LINE-1 – F primer<br>CAATCGCGTGGAACCTTGAGAC                                           | (Skene et al., 2010)          | N/A |
| LINE-1 – R primer<br>GACTCAGCTGGCAAGGTAGC                                             | (Skene et al., 2010)          | N/A |
| IAP – F primer<br>GCTTTCGTTTTTGGGGCTTGG                                               | (Skene et al., 2010)          | N/A |
| IAP – R primer<br>CTTACTCCGCGTTCTCACGAC                                               | (Skene et al., 2010)          | N/A |
